# Supplementary material for: Inhibitory control during selective retrieval may hinder subsequent analogical thinking
Source: PubMed Central journal article supplement (PMC6372166; doi:10.1371/journal.pone.0211881), 2019-02-12
Supplement: pone.0211881.s001.pdf [file pone.0211881.s001.pdf]

**S1 Table.**

| <b>Practiced Status</b> | <b>BA</b> | <b>Analogy</b>                               | <b>MA</b>  | <b>Analogy</b>                                      |
|-------------------------|-----------|----------------------------------------------|------------|-----------------------------------------------------|
| Rp+/Nrp+/Np+ items      | Bambú     | ARDILLA es a BELLOTA como OSO PANDA es a...  | Maquillaje | LIBRO es a BIBLIOTECA como COLORETE es a...         |
|                         | Balanza   | PAZ es a PALOMA como JUSTICIA es a...        | Marinero   | PARQUE es a NIÑOS como BARCO es a...                |
|                         | Bañera    | DORMIRSE es a CAMA como LAVARSE es a...      | Matanza    | LIEBRE es a CACERÍA como CERDO es a...              |
| Rp-/Nrp-/Np- items      | Bandera   | GOLPEAR es a MARTILLO como IZAR es a...      | Madurez    | AVARICIA es a GENEROSIDAD como INFANTILISMO a...    |
|                         | Basura    | DISPUTA es a PELEA como DESPERDICIOS es a... | Maleta     | ENCICLOPEDIA es a LIBRO como EQUIPAJE es a...       |
|                         | Batalla   | BERLÍN es a MURO como TRAFALGAR es a...      | Manual     | DIVERSIÓN es a ABURRIMIENTO como AUTOMÁTICO es a... |

  

| <b>Practiced Status</b> | <b>DE</b>  | <b>Analogy</b>                                   | <b>CA</b> | <b>Analogy</b>                             |
|-------------------------|------------|--------------------------------------------------|-----------|--------------------------------------------|
| Rp+/Nrp+/Np+ items      | Detective  | BISTURÍ es a CIRUJANO como LUPA es a...          | Canario   | PASTOR es a ALEMÁN como PLÁTANO es a...    |
|                         | Delito     | HEPATITIS es a ENFERMEDAD como HOMICIDIO es a... | Capitán   | CIUDAD es a ALCALDE como BARCO es a...     |
|                         | Debate     | ARMA es a GUERRA como ARGUMENTO es a...          | Caracol   | CABALLO es a CEBRA como BABOSA a...        |
| Rp-/Nrp-/Np- items      | Desastre   | IRA es a FURIA como CATÁSTROFE es a...           | Cabello   | CIELO es a TOCINO como ÁNGEL es a...       |
|                         | Deporte    | PASTEL es a REPOSTERÍA como ATLETISMO es a...    | Camarero  | MUEBLE es a CARPINTERO como CÓCTEL es a... |
|                         | Democracia | LIBERTAD es a ESCLAVITUD como DICTADURA es a...  | Catedral  | PENSIÓN es a HOTEL como IGLESIA es a...    |

  

| <b>Practiced Status</b> | <b>PE</b> | <b>Analogy</b>                                   | <b>FA</b> | <b>Analogy</b>                                     |
|-------------------------|-----------|--------------------------------------------------|-----------|----------------------------------------------------|
| Rp+/Nrp+/Np+ items      | Pedazo    | ESTUDIANTE es a ALUMNO como TROZO es a...        | Fauna     | ESTRELLA es a CONSTELACIÓN como ANIMAL es a...     |
|                         | Pesimismo | ALEGRÍA es a ENTUSIASMO como NEGATIVIDAD a...    | Fallo     | SUEÑO es a REALIDAD como ACIERTO es a...           |
|                         | Petición  | PROHIBICIÓN es a NEGACIÓN como SOLICITUD es a... | Farmacia  | FRUTA es a MERCADO como MEDICAMENTO es a...        |
| Rp-/Nrp-/Np- items      | Pelota    | CUBO es a DADO como ESFERA es a...               | Fábrica   | HOSTELERÍA es a RESTAURANTE como INDUSTRIA es a... |
|                         | Península | BALEAR es a ARCHIPIÉLAGO como IBÉRICA es a...    | Fantasía  | RISA es a COMEDIA como DRAGÓN es a...              |
|                         | Pereza    | GLOTONERÍA es a GULA como VAGUEZA es a...        | Famoso    | ROBUSTO es a GORDO como CÉLEBRE es a...            |

  

| <b>Practiced Status</b> | <b>DI</b> | <b>Analogy</b>                                 | <b>RE</b>   | <b>Analogy</b>                                  |
|-------------------------|-----------|------------------------------------------------|-------------|-------------------------------------------------|
| Rp+/Nrp+/Np+ items      | Digestión | MECÁNICO es a REPARACIÓN como ESTÓMAGO es a... | Rebaño      | PECES es a BANCO como OVEJAS es a...            |
|                         | Dilema    | DESEO es a ANHELO como PROBLEMA es a...        | Receta      | LAVADORA es a INSTRUCCIONES como COMIDA es a... |
|                         | Divorcio  | ALIVIO es a ANGUSTIA como MATRIMONIO es a...   | Relámpago   | NUBLADO es a LLUVIA como TRUENO es a...         |
| Rp-/Nrp-/Np- items      | Diciembre | SEMANA es a DOMINGO como AÑO es a...           | Regalo      | FATIGA es a CANSANCIO como OBSEQUIO es a...     |
|                         | Difunto   | REY es a MONARCA como FALLECIDO es a...        | Restaurante | CATÁLOGO es a SUPERMERCADO como MENÚ es a...    |
|                         | Diseño    | CANCIÓN es a COMPOSICIÓN como ROPA a...        | Retrato     | CAMA es a LECHO como FOTOGRAFÍA es a...         |

| <b>Practiced Status</b> | <b>TA</b> | <b>Analogy</b>                            |
|-------------------------|-----------|-------------------------------------------|
| Rp+/Nrp+/Np+ items      | Tango     | BRASIL es a SAMBA como ARGENTINA es a...  |
|                         | Tarjeta   | TRÁFICO es a MULTA como FÚTBOL es a...    |
|                         | Tacto     | SONIDO es a OÍDO como CARICIA es a...     |
| Rp-/Nrp-/Np- items      | Taller    | FLOR es a CAMPO como HERRAMIENTA es a...  |
|                         | Taza      | FLOR es JARRÓN como CAFÉ es a...          |
|                         | Tabaco    | PROTEÍNA es a POLLO como NICOTINA es a... |

---
